# Supplementary material for: Synergistic Action of Gefitinib and GSK41364A Simultaneously Loaded in Ratiometrically-Engineered Polymeric Nanoparticles for Glioblastoma Multiforme
Source: MDPI journal article supplement (doi:10.3390/jcm8030367), 2019-03-15
Supplement: s1 [file s1]

## Supplementary Materials:

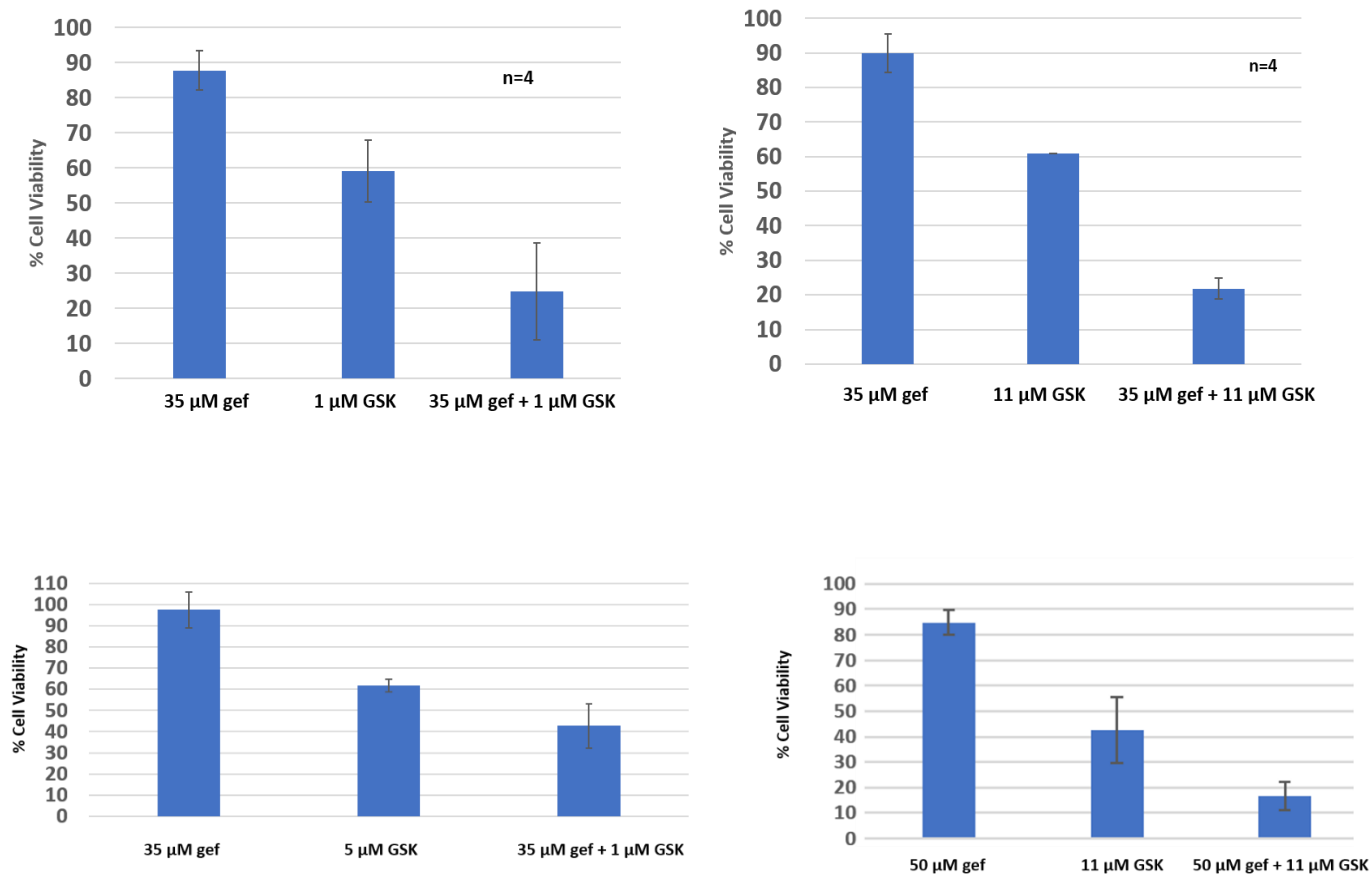

**Supplementary Figure S1:** Evaluation of cell viability post treatment with different sets of combination of free gefitinib and free GSK461364A

(2A)

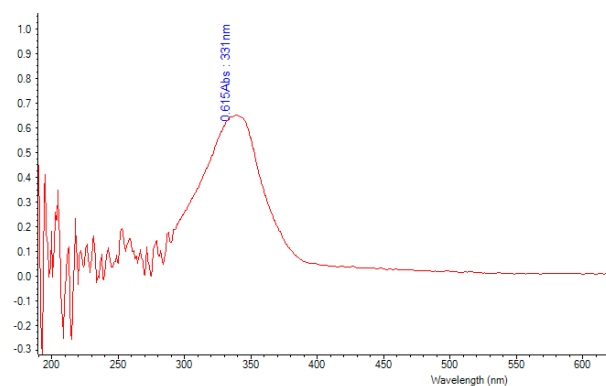

(2B)

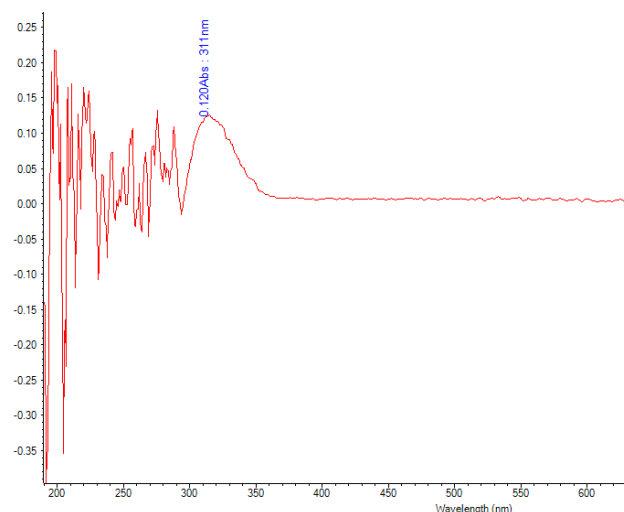

**Supplementary Figure S2** : Peak absorbance of **(2A)** gefitinib at 331nm dissolved in 1% Triton-x, with GSK461364A as blank **(2B)** GSK461364A at 311nm with gefitinib as blank

(3A)

|                                | Size (d.nm):         | % Intensity: | St Dev (d.nm): |
|--------------------------------|----------------------|--------------|----------------|
| <b>Z-Average (d.nm):</b> 122.1 | <b>Peak 1:</b> 135.5 | 100.0        | 43.99          |
| <b>Pdl:</b> 0.091              | <b>Peak 2:</b> 0.000 | 0.0          | 0.000          |
| <b>Intercept:</b> 0.966        | <b>Peak 3:</b> 0.000 | 0.0          | 0.000          |
| <b>Result quality :</b> Good   |                      |              |                |

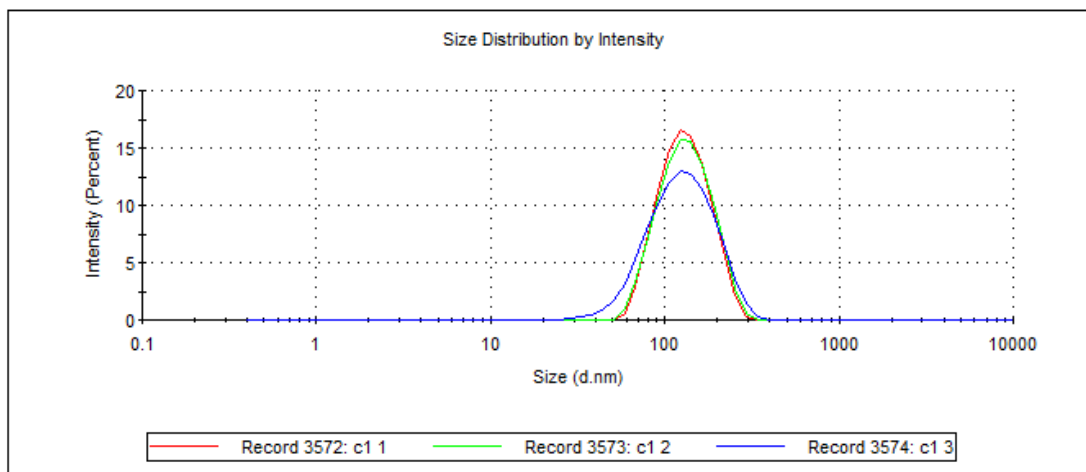

(3B)

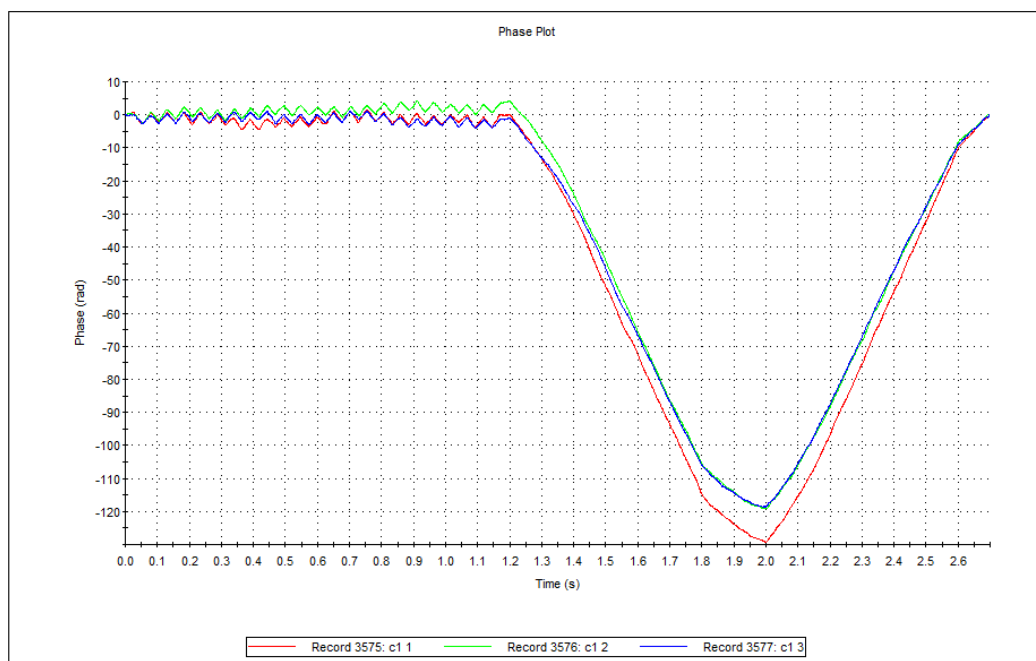

(3C)

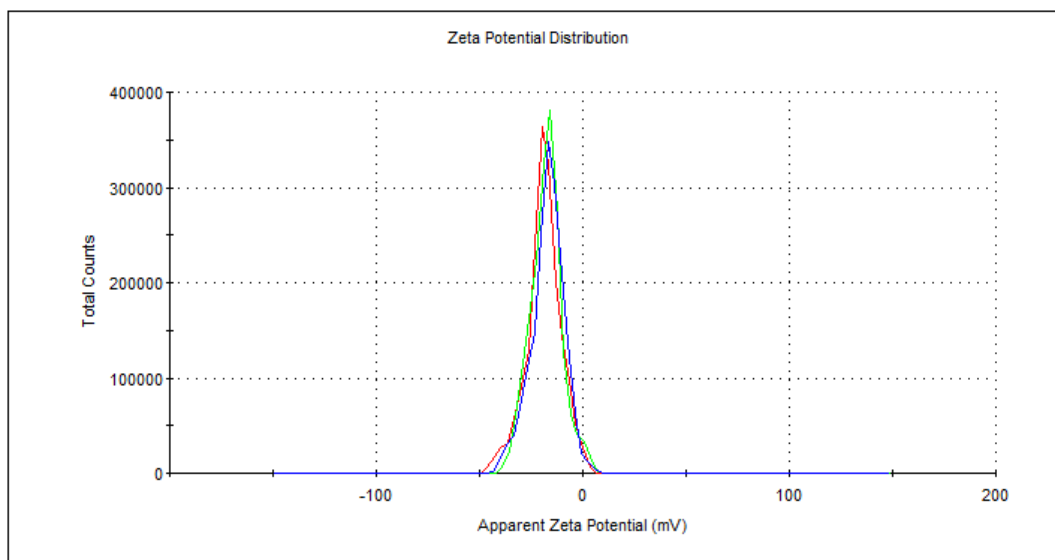

Supplementary Figure S3: (A) Size distribution by intensity with the average size being ~122 nm. (B) Phase plot of zeta potential plotted against time (C) Zeta potential distribution with total counts plotted against apparent zeta potential. Average zeta potential was ~20 mV.

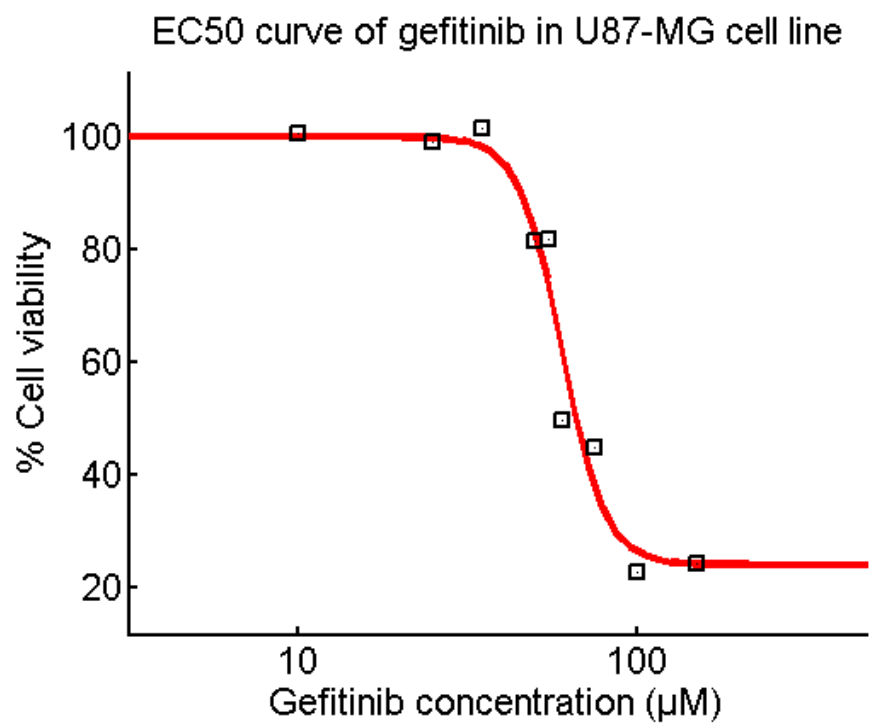

**Supplementary Figure S4:** Effective concentration (EC<sub>50</sub>) curve of gefitinib in U87-MG cell line plotted using Dr.Fit® software. These data points follow monophasic model (standard Hill equation).
